# Supplementary material for: Repetitive transcranial magnetic stimulation as an augmentative strategy for treatment-resistant depression, a meta-analysis of randomized, double-blind and sham-controlled study
Source: Springer Nature journal article supplement (doi:10.1186/s12888-014-0342-4), 2014-11-29

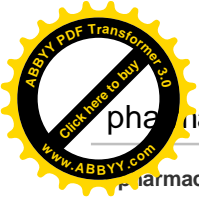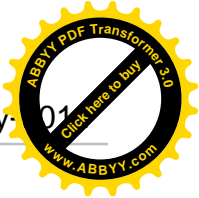

pharmacotherapy + active rTMS vs pharmacotherapy only for TRD

2.21 baseline HAMD scores in treatment-resistant depression

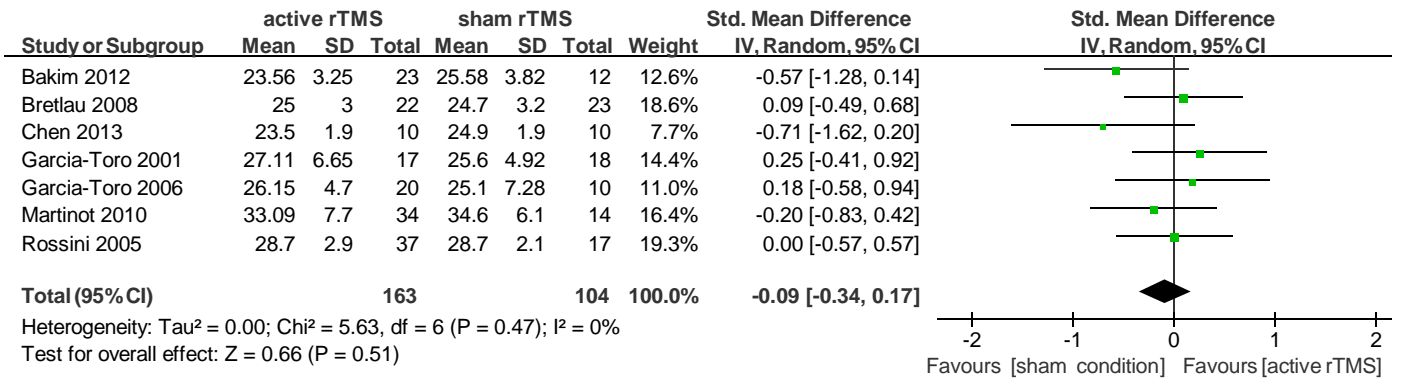

Supplement: MOESM10 [file 9747622]
